# Supplementary material for: N-Heterocyclic carbene–palladium(II)-1-methylimidazole complex catalyzed Mizoroki–Heck reaction of aryl chlorides with styrenes
Source: publisher site journal article supplement (doi:10.3762/bjoc.8.222), 2012-11-12
Supplement: Additional file 1 [file 1860-5397-8-222-S1.pdf]

**Supporting Information**  
**for**  
***N*-Heterocyclic carbene–palladium(II)-1-methylimidazole**  
**complex catalyzed Mizoroki–Heck reaction of aryl chlorides**  
**with styrenes**

Ting-Ting Gao, Ai-Ping Jin and Li-Xiong Shao\*

Address: College of Chemistry and Materials Engineering, Wenzhou University,  
Chashan University Town, Zhejiang Province 325035, People's Republic of China.

Email: Li-Xiong Shao\* - [Shaolix@wzu.edu.cn](mailto:Shaolix@wzu.edu.cn)

\* Corresponding author

**General procedure for the NHC-Pd(II)-Im complex 1 catalyzed Mizoroki–Heck**  
**reaction, characterization data and copies of spectra**

**Table of contents**

|                                         |     |
|-----------------------------------------|-----|
| General remarks .....                   | S2  |
| General procedure .....                 | S2  |
| Characterization data and spectra ..... | S3  |
| References.....                         | S22 |

**General remarks:**  $^1\text{H}$  and  $^{13}\text{C}$  NMR spectra were recorded on a Bruker Avance-300 MHz or Bruker Avance-500 MHz spectrometer for solutions in  $\text{CDCl}_3$  with tetramethylsilane (TMS) as an internal standard;  $J$ -values are in Hz. Commercially obtained reagents were used without further purification. Flash column chromatography was carried out using Huanghai 300–400 mesh silica gel at increased pressure.

**General procedure:** Under air, TBAB (2.0 g),  $\text{Cs}_2\text{CO}_3$  (488.7 mg, 2.0 equiv), NHC-Pd(II)-Im complex **1** (4.9 mg, 1.0 mol %), styrenes **3** (0.90 mmol) and aryl chlorides **2** (0.75 mmol) were successively added into a sealed tube. Then the mixture was stirred at 140 °C for 12 h. After cooling to room temperature, the reaction mixture was diluted with ethyl acetate, washed with 1 M HCl (15 mL x 2), brine (15 mL x 2) and dried over anhydrous  $\text{Na}_2\text{SO}_4$ . The solvent was evaporated in vacuo and then purified by flash column chromatography on silica gel to give the pure products.



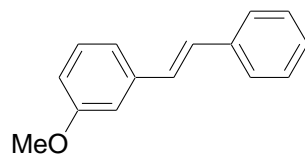

Compound **4b** [1]: a colorless liquid;  $^1\text{H}$  NMR (500 MHz;  $\text{CDCl}_3$ )  $\delta$  3.82 (s, 3H), 6.81 (d,  $J = 8.0$  Hz, 1H), 7.04–7.11 (m, 4H), 7.19–7.35 (m, 4H), 7.49 (d,  $J = 8.0$  Hz, 2H);  $^{13}\text{C}$  NMR (125 MHz,  $\text{CDCl}_3$ )  $\delta$  55.3, 111.8, 113.3, 119.3, 126.5, 127.7, 128.6, 128.7, 129.6, 137.3, 138.8, 159.9.

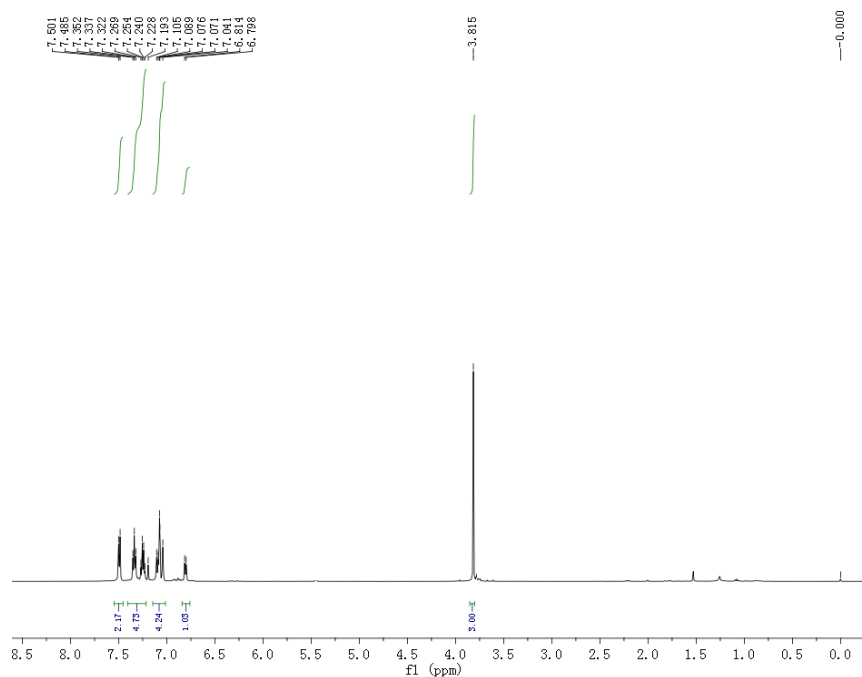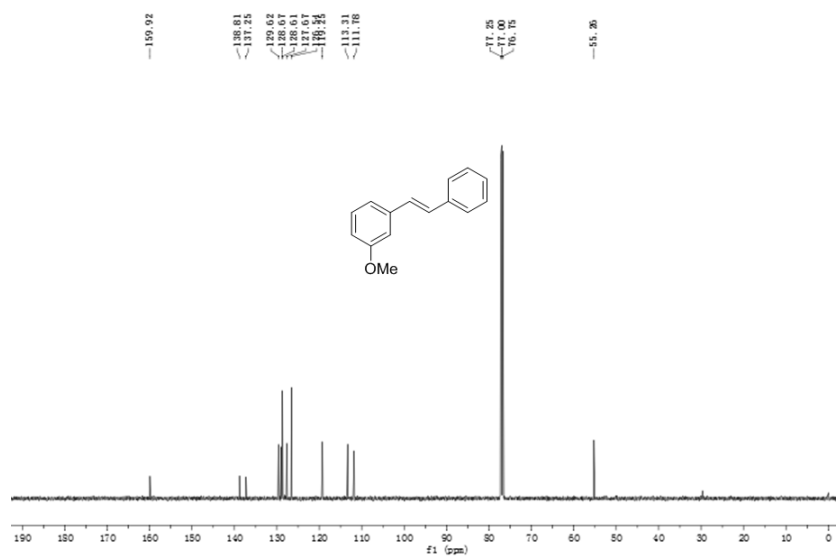

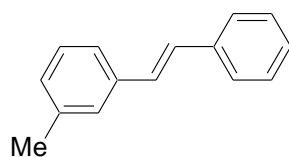

Compound **4c** [2]: a white solid;  $^1\text{H NMR}$  (300 MHz,  $\text{CDCl}_3$ )  $\delta$  2.34 (s, 3H), 7.00–7.11 (m, 3H), 7.18–7.34 (m, 6H), 7.46–7.49 (m, 2H);  $^{13}\text{C NMR}$  (125 MHz,  $\text{CDCl}_3$ )  $\delta$  21.4, 123.7, 126.4, 127.2, 127.5, 128.40, 128.44, 128.5, 128.6, 128.8, 137.2, 137.4, 138.1.

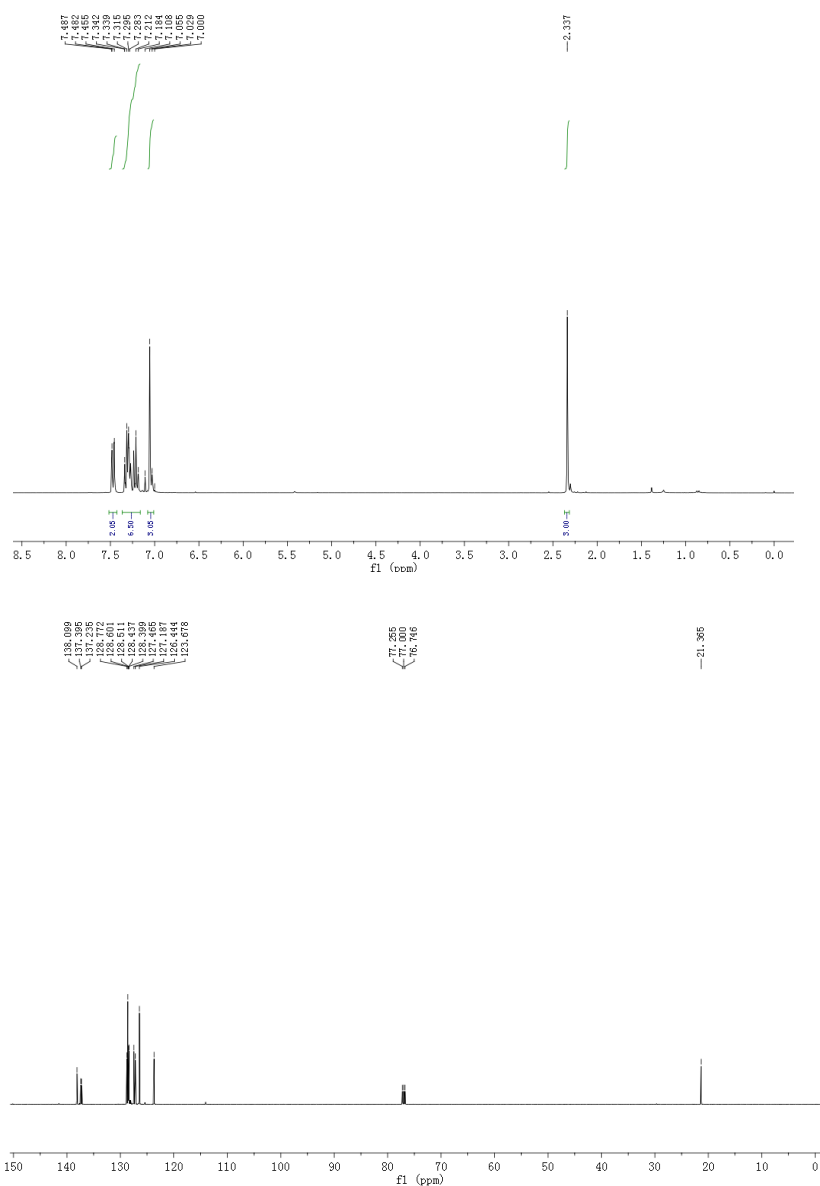

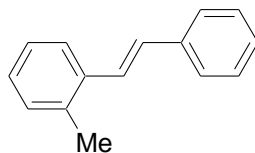

Compound **4d** [2]: a colorless liquid;  $^1\text{H}$  NMR (300 MHz,  $\text{CDCl}_3$ )  $\delta$  2.38 (s, 3H), 6.96 (d,  $J = 15.9$  Hz, 1H), 7.13–7.34 (m, 7H), 7.47–7.57 (m, 3H);  $^{13}\text{C}$  NMR (125 MHz,  $\text{CDCl}_3$ )  $\delta$  19.9, 125.4, 126.2, 126.55, 126.57, 127.5, 127.6, 128.7, 130.0, 130.4, 135.8, 136.4, 137.7.

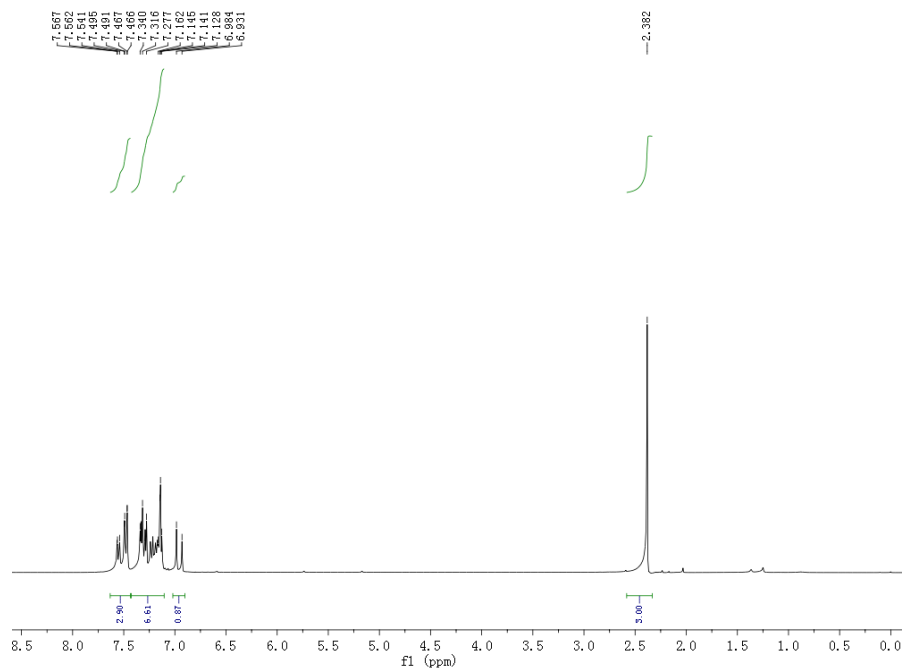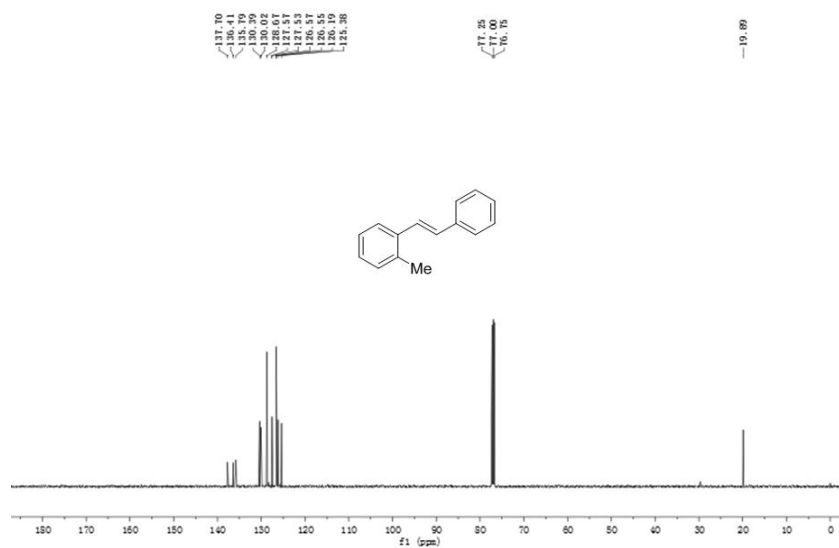



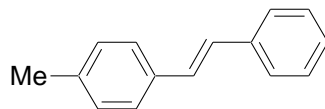

Compound **4f** [4]: a white solid;  $^1\text{H}$  NMR (300 MHz,  $\text{CDCl}_3$ )  $\delta$  2.35 (s, 3H), 7.04 (d,  $J = 16.5$  Hz, 1H), 7.10 (d,  $J = 16.5$  Hz, 1H), 7.16 (d,  $J = 7.8$  Hz, 2H), 7.23 (t,  $J = 7.8$  Hz, 1H), 7.34 (t,  $J = 7.8$  Hz, 2H), 7.41 (d,  $J = 7.8$  Hz, 2H), 7.49 (d,  $J = 7.5$  Hz, 2H);  $^{13}\text{C}$  NMR (125 MHz,  $\text{CDCl}_3$ )  $\delta$  21.2, 126.37, 126.41, 127.4, 127.7, 128.61, 128.62, 129.4, 134.5, 137.48, 137.50.

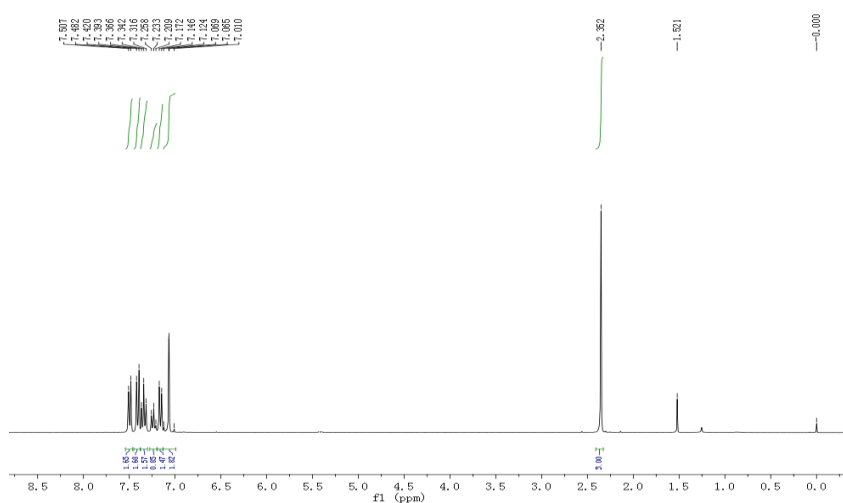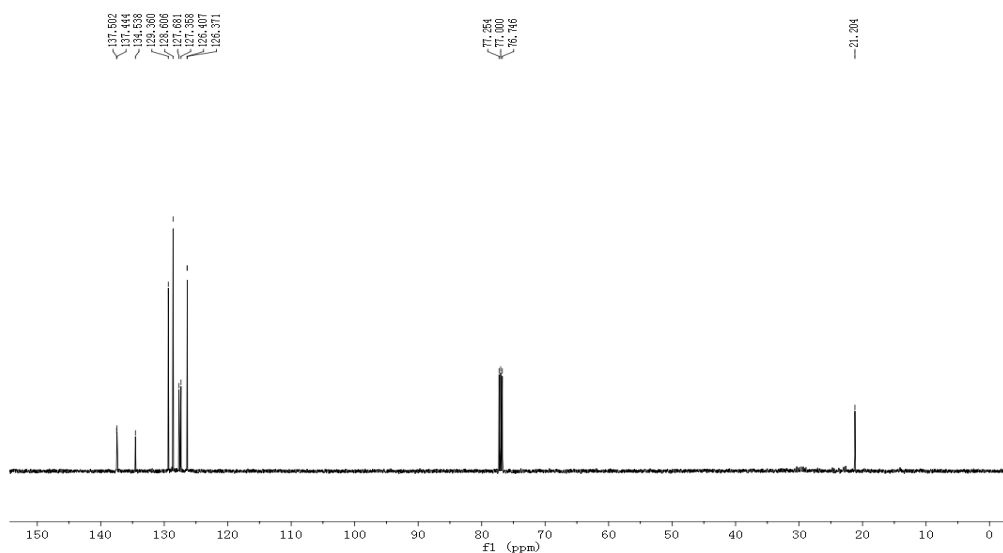



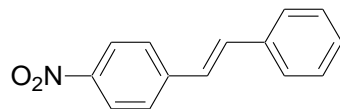

Compound **4g** [2]: a yellow solid;  $^1\text{H}$  NMR (300 MHz,  $\text{CDCl}_3$ )  $\delta$  7.14 (d,  $J = 16.5$  Hz, 1H), 7.28 (d,  $J = 16.5$  Hz, 1H), 7.34–7.43 (m, 3H), 7.56 (d,  $J = 7.5$  Hz, 2H), 7.63 (d,  $J = 8.4$  Hz, 2H), 8.22 (d,  $J = 8.4$  Hz, 2H);  $^{13}\text{C}$  NMR (75 MHz,  $\text{CDCl}_3$ )  $\delta$  124.1, 126.2, 126.8, 127.0, 128.8, 128.9, 133.3, 136.1, 143.8, 146.7.

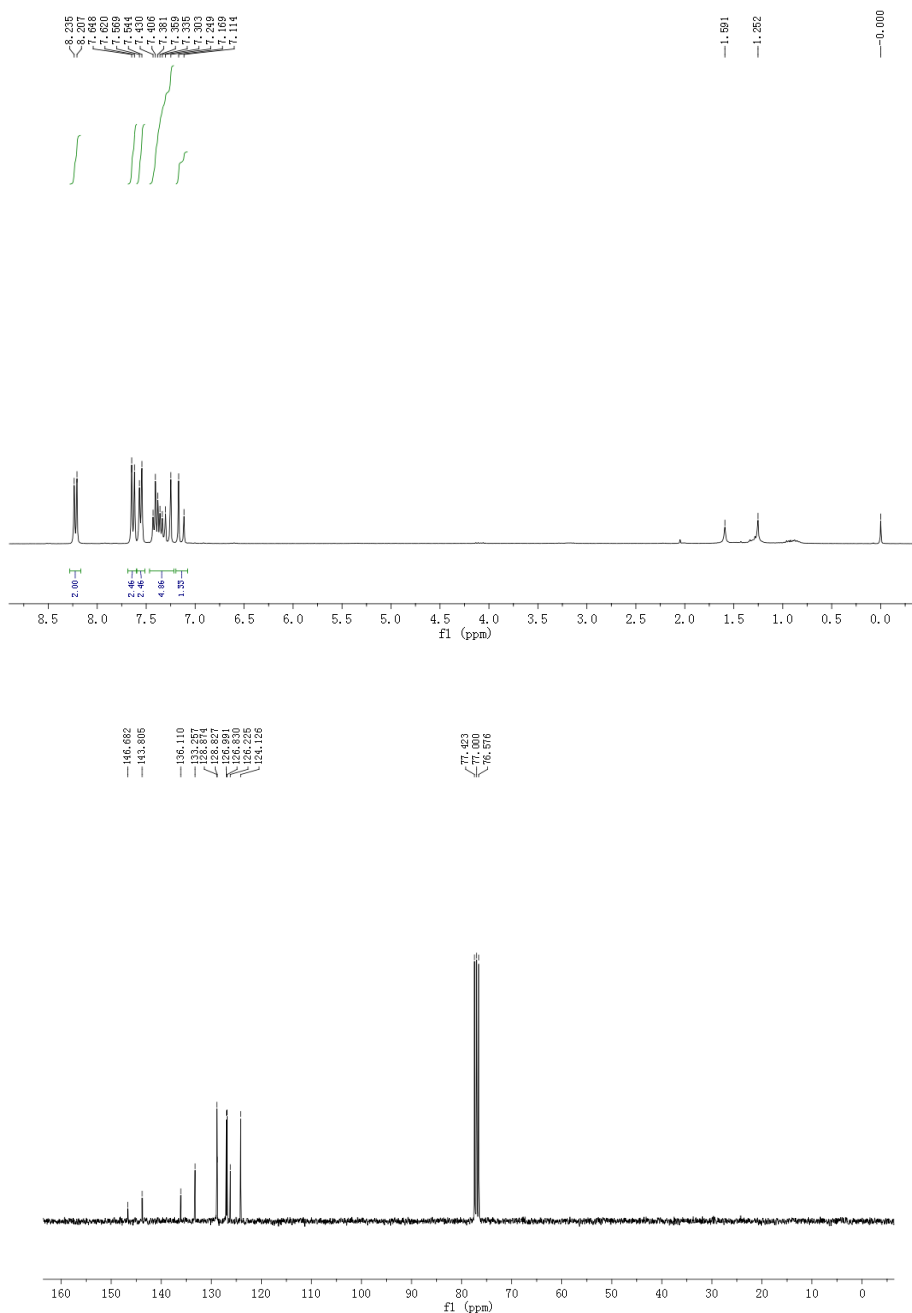

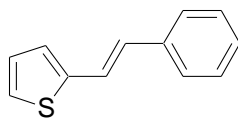

Compound **4h** [5]: a yellow solid;  $^1\text{H}$  NMR (300 MHz,  $\text{CDCl}_3$ )  $\delta$  6.93 (d,  $J = 15.9$  Hz, 1H), 7.00 (dd,  $J = 3.6, 5.1$  Hz, 1H), 7.06–7.07 (m, 1H), 7.18–7.37 (m, 5H), 7.45–7.48 (m, 2H);  $^{13}\text{C}$  NMR ( $\text{CDCl}_3$ , 125 MHz)  $\delta$  121.8, 124.3, 126.1, 126.3, 127.6, 128.3, 128.7, 136.9, 142.9.

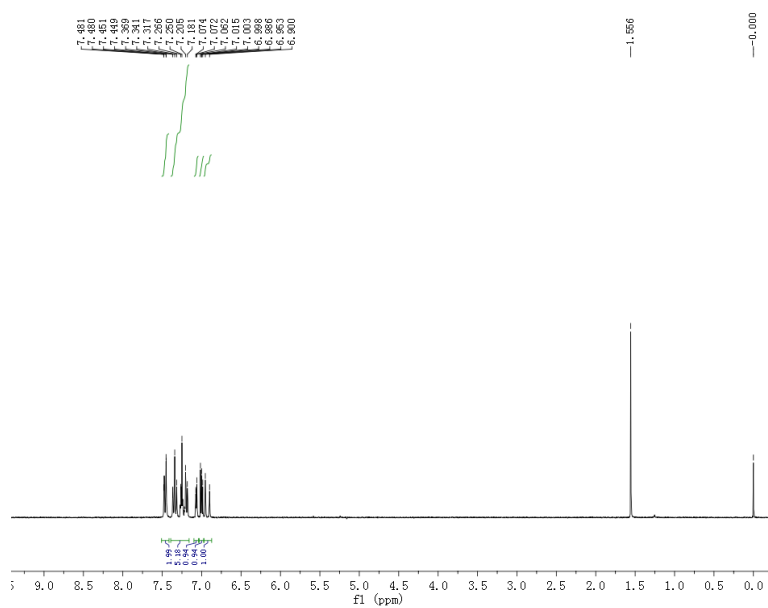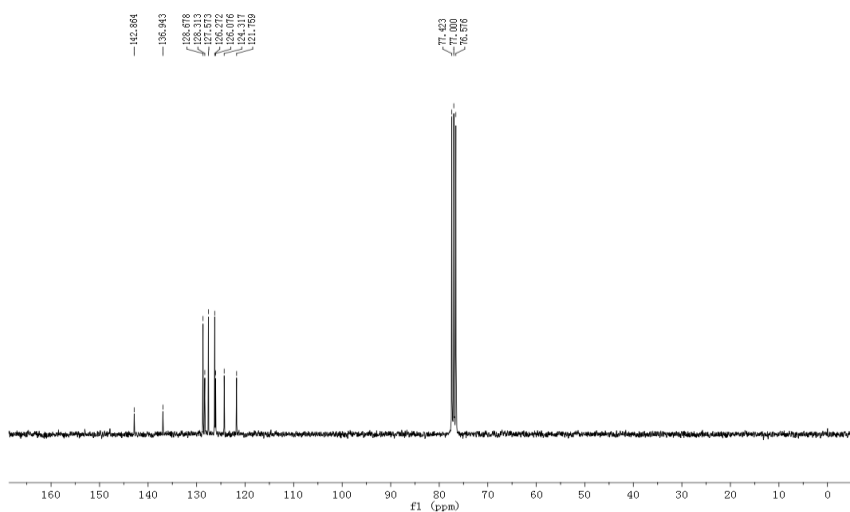

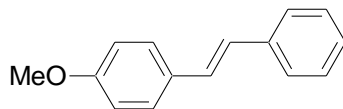

Compound **4i** [5]: a white solid;  $^1\text{H}$  NMR (500 MHz,  $\text{CDCl}_3$ )  $\delta$  3.83 (s, 3H), 6.90 (d,  $J = 8.5$  Hz, 2H), 6.97 (d,  $J = 16.0$  Hz, 1H), 7.07 (d,  $J = 16.0$  Hz, 1H), 7.23 (t,  $J = 7.5$  Hz, 1H), 7.34 (t,  $J = 7.5$  Hz, 2H), 7.45 (d,  $J = 8.5$  Hz, 2H), 7.49 (d,  $J = 8.5$  Hz, 2H);  $^{13}\text{C}$  NMR (125 MHz,  $\text{CDCl}_3$ )  $\delta$  55.3, 114.1, 126.2, 126.6, 127.2, 127.7, 128.2, 128.6, 130.2, 137.7, 159.3.

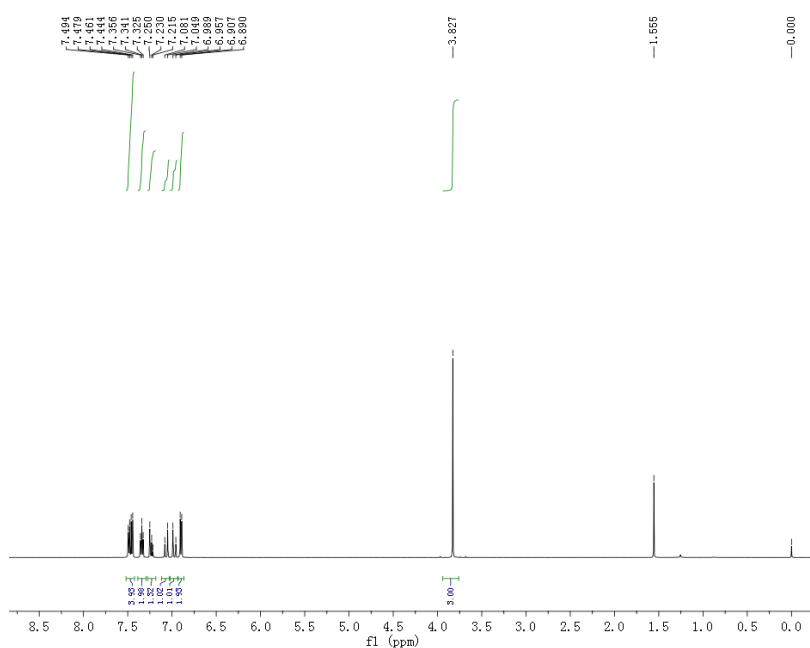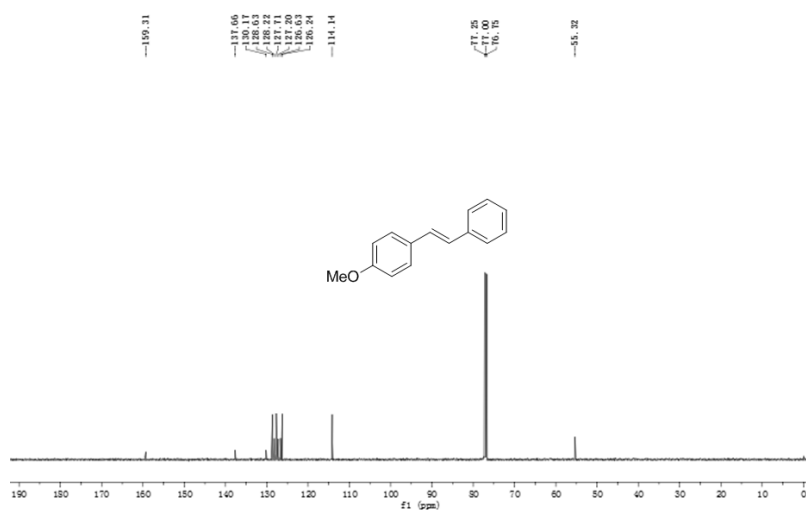

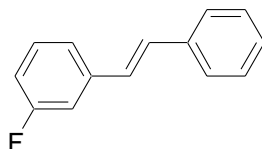

Compound **4j** [6]: a white solid;  $^1\text{H}$  NMR (500 MHz,  $\text{CDCl}_3$ )  $\delta$  6.92 (t,  $J = 8.0$  Hz, 1H), 7.01 (d,  $J = 15.6$  Hz, 1H), 7.07 (d,  $J = 15.6$  Hz, 1H), 7.17–7.35 (m, 6H), 7.47 (d,  $J = 7.5$  Hz, 2H);  $^{13}\text{C}$  NMR (125 MHz,  $\text{CDCl}_3$ )  $\delta$  112.7 (d,  $J_{\text{C-F}} = 21.8$  Hz), 114.3 (d,  $J_{\text{C-F}} = 21.4$  Hz), 122.4, 126.6, 127.4, 127.9, 128.7, 130.0, 136.8, 139.7 (d,  $J_{\text{C-F}} = 7.7$  Hz), 163.1 (d,  $J_{\text{C-F}} = 243.8$  Hz).

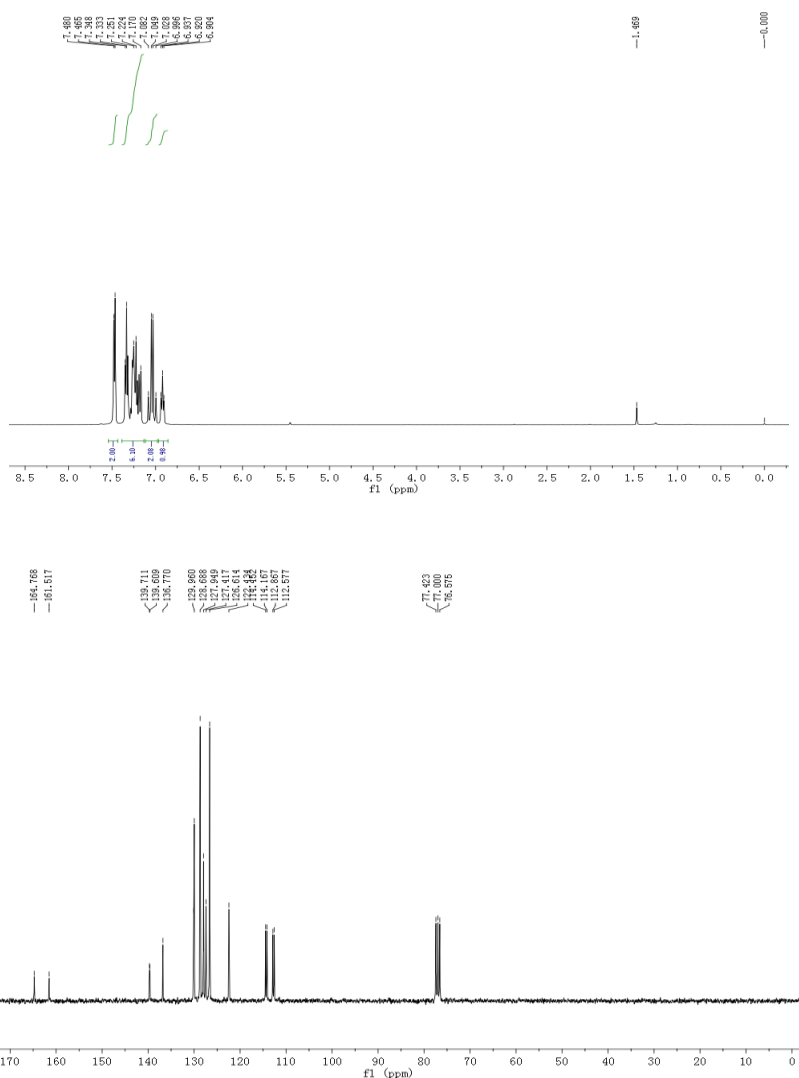

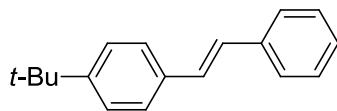

Compound **4k** [7]: a white solid;  $^1\text{H}$  NMR (300 MHz,  $\text{CDCl}_3$ )  $\delta$  1.32 (s, 9H), 7.05 (d,  $J = 16.5$  Hz, 1H), 7.09 (d,  $J = 16.5$  Hz, 1H), 7.22 (t,  $J = 7.0$  Hz, 1H), 7.31–7.37 (m, 4H), 7.44 (d,  $J = 8.0$  Hz, 2H), 7.48 (d,  $J = 8.0$  Hz, 2H);  $^{13}\text{C}$  NMR (125 MHz,  $\text{CDCl}_3$ )  $\delta$  31.3, 34.6, 125.6, 126.2, 126.4, 127.4, 127.9, 128.5, 128.6, 134.5, 137.5, 150.7.

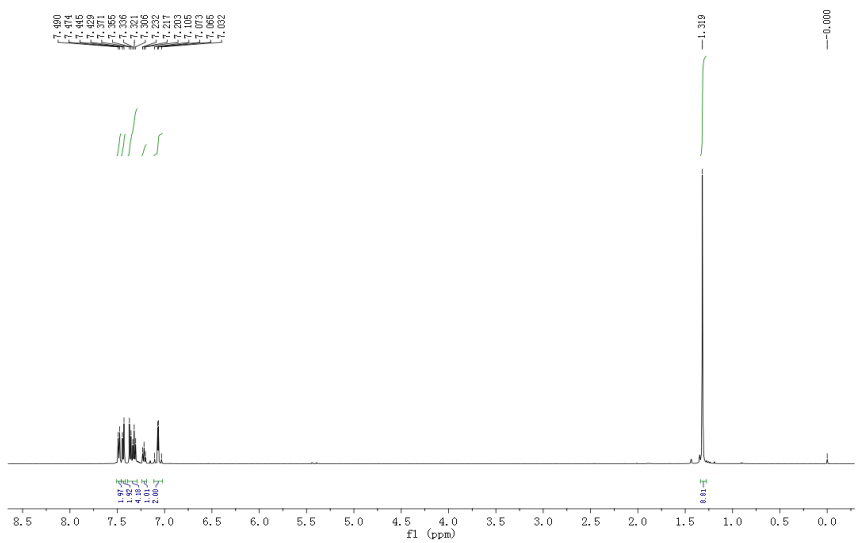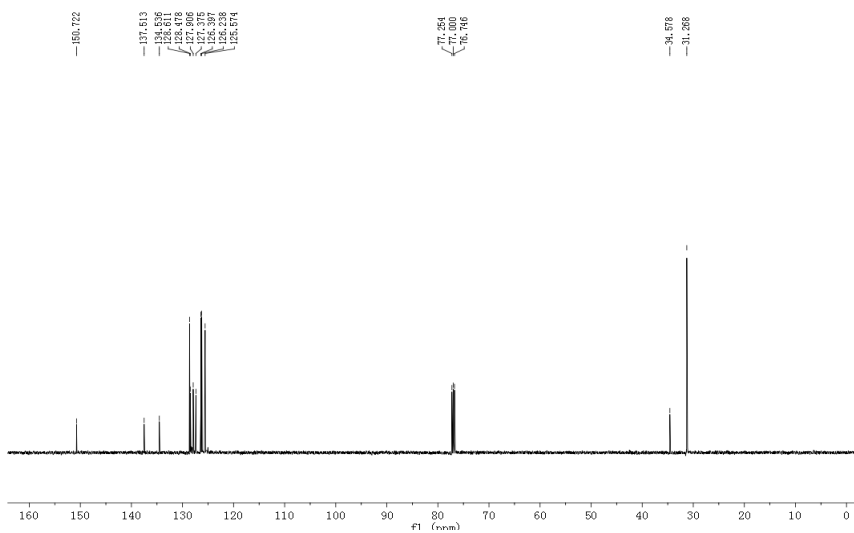

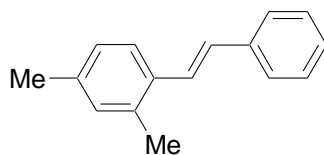

Compound **4I** [8]: a colorless liquid;  $^1\text{H}$  NMR (500 MHz,  $\text{CDCl}_3$ )  $\delta$  2.31 (s, 3H), 2.39 (s, 3H), 6.95 (d,  $J = 16.0$  Hz, 1H), 6.99–7.02 (m, 2H), 7.22–7.36 (m, 4H), 7.48–7.51 (m, 3H);  $^{13}\text{C}$  NMR (125 MHz,  $\text{CDCl}_3$ )  $\delta$  19.8, 21.1, 125.3, 126.4, 126.9, 127.4, 128.6, 129.0, 131.2, 133.5, 135.6, 137.3, 137.8.

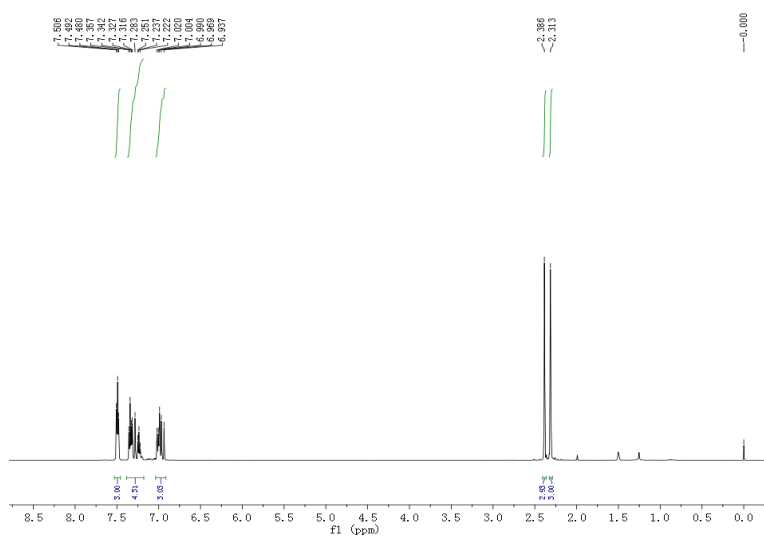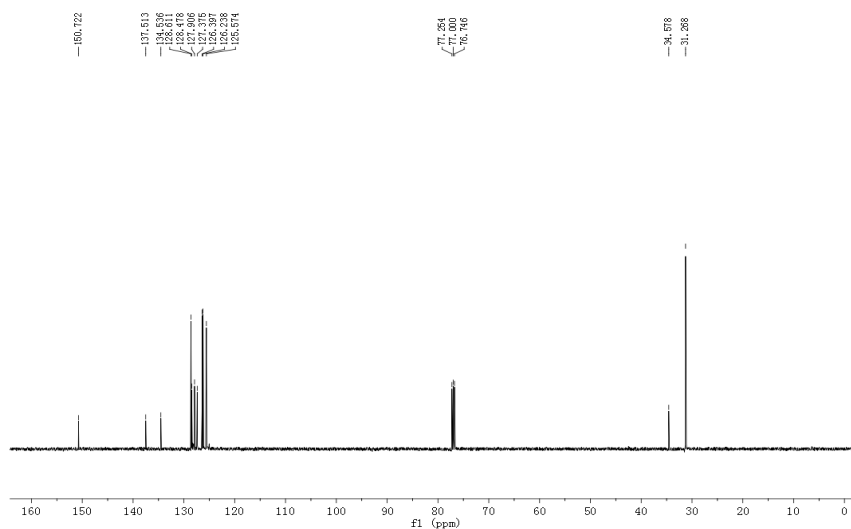

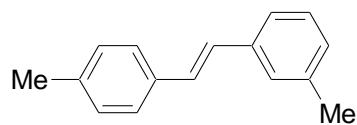

Compound **4m** [3]: a white solid;  $^1\text{H}$  NMR (500 MHz,  $\text{CDCl}_3$ )  $\delta$  2.35 (s, 3H), 2.37 (s, 3H), 7.03 (d,  $J = 15.9$  Hz, 1H), 7.06–7.09 (m, 2H), 7.16 (d,  $J = 7.5$  Hz, 2H), 7.22–7.32 (m, 3H), 7.40 (d,  $J = 8.0$  Hz, 2H);  $^{13}\text{C}$  NMR (125 MHz,  $\text{CDCl}_3$ )  $\delta$  21.2, 21.4, 123.6, 126.4, 127.1, 127.8, 128.2, 128.4, 128.5, 129.4, 134.6, 137.4, 137.5, 138.2.

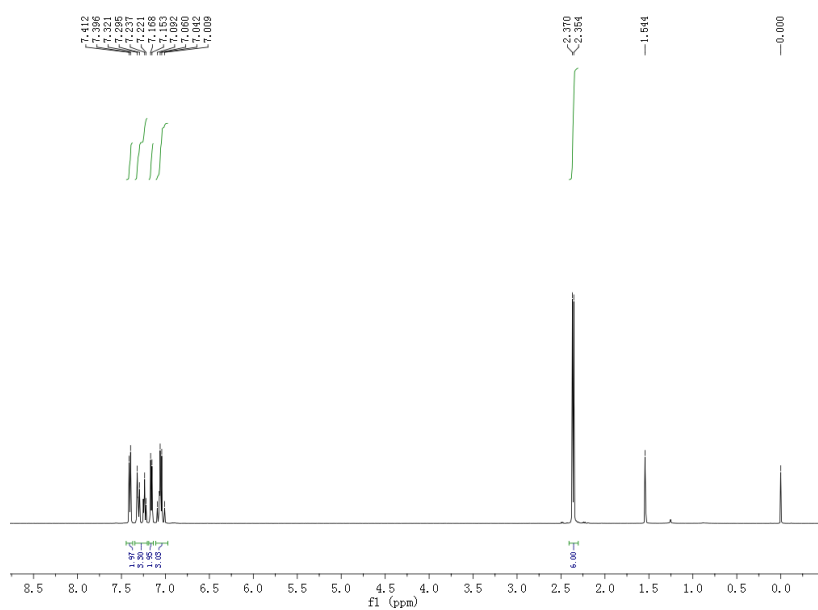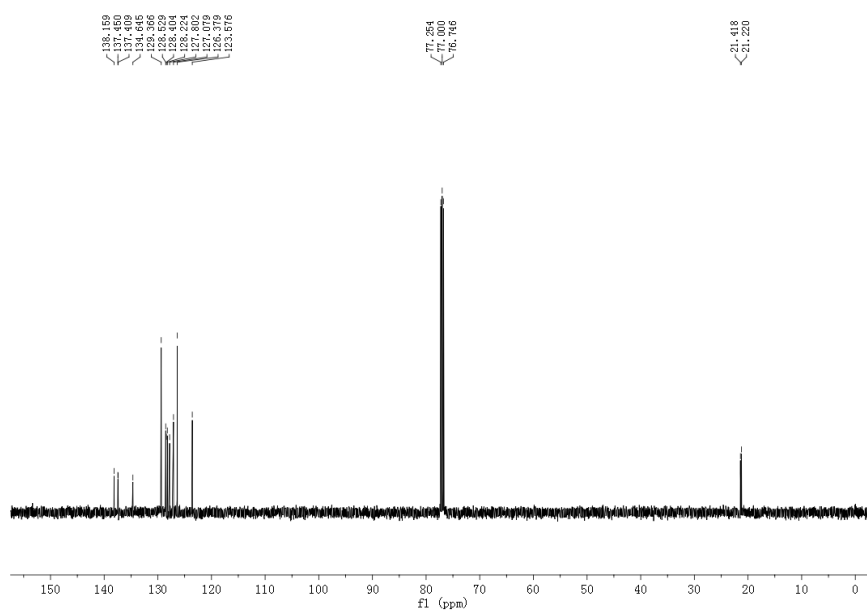

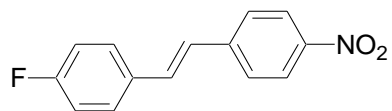

Compound **4n** [9]: a yellow solid;  $^1\text{H}$  NMR (500 MHz,  $\text{CDCl}_3$ )  $\delta$  7.06 (d,  $J = 16.5$  Hz, 1H), 7.10 (d,  $J = 7.0$  Hz, 2H), 7.22 (d,  $J = 16.5$  Hz, 1H), 7.52 (t,  $J = 7.0$  Hz, 2H), 7.61 (d,  $J = 8.0$  Hz, 2H), 8.22 (d,  $J = 8.0$  Hz, 2H);  $^{13}\text{C}$  NMR (125 MHz,  $\text{CDCl}_3$ )  $\delta$  115.9 (d,  $J_{\text{C-F}} = 21.8$  Hz), 124.1, 126.1 (d,  $J_{\text{C-F}} = 2.3$  Hz), 126.8, 128.6 (d,  $J_{\text{C-F}} = 8.1$  Hz), 132.0, 132.4, 143.7, 146.8, 163.0 (d,  $J_{\text{C-F}} = 247.9$  Hz).

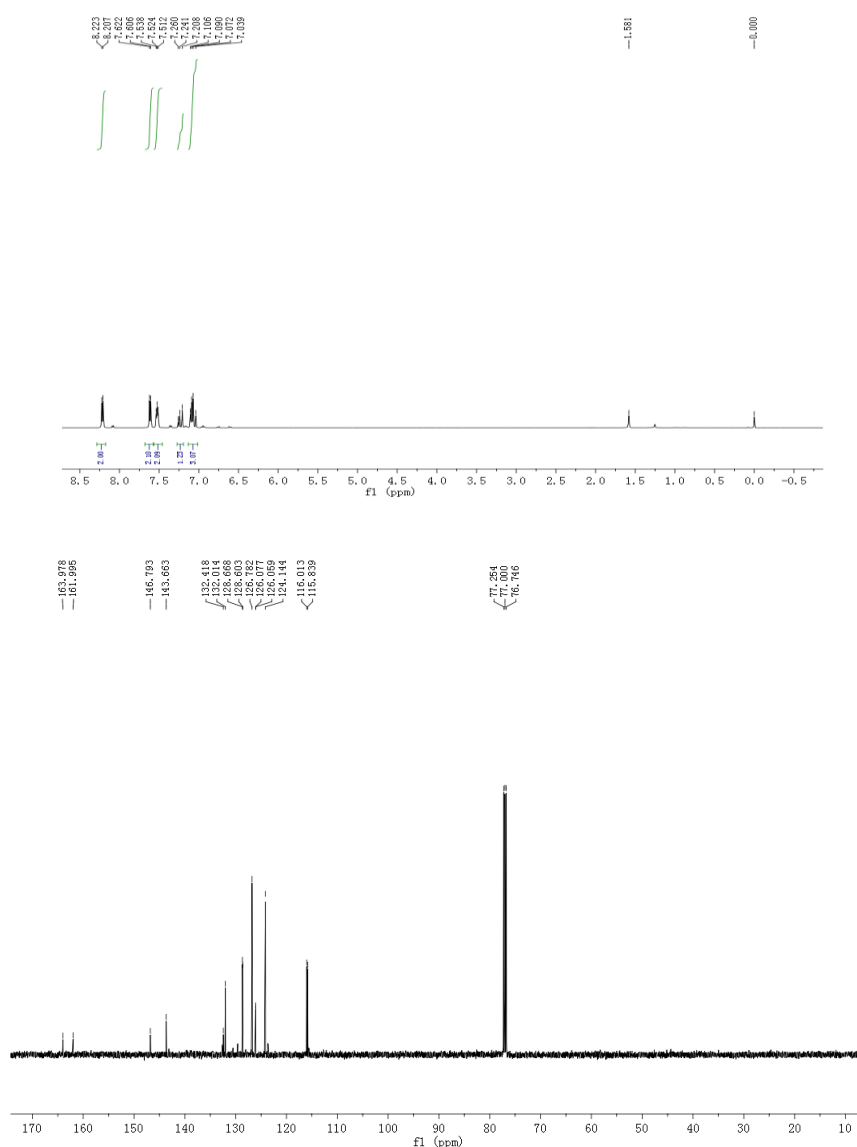



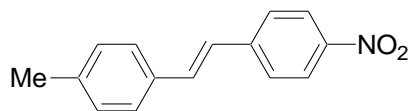

Compound **4o** [3]: a yellow solid;  $^1\text{H}$  NMR (500 MHz,  $\text{CDCl}_3$ )  $\delta$  2.38 (s, 3H), 7.09 (d,  $J = 16.0$  Hz, 1H), 7.22 (d,  $J = 7.5$  Hz, 2H), 7.24 (d,  $J = 16.0$  Hz, 1H), 7.44 (d,  $J = 7.5$  Hz, 2H), 7.61 (d,  $J = 8.5$  Hz, 2H), 8.20 (d,  $J = 8.5$  Hz, 2H);  $^{13}\text{C}$  NMR (125 MHz,  $\text{CDCl}_3$ )  $\delta$  21.3, 124.1, 125.3, 126.7, 127.0, 129.6, 133.3, 133.4, 139.0, 144.1, 146.6.

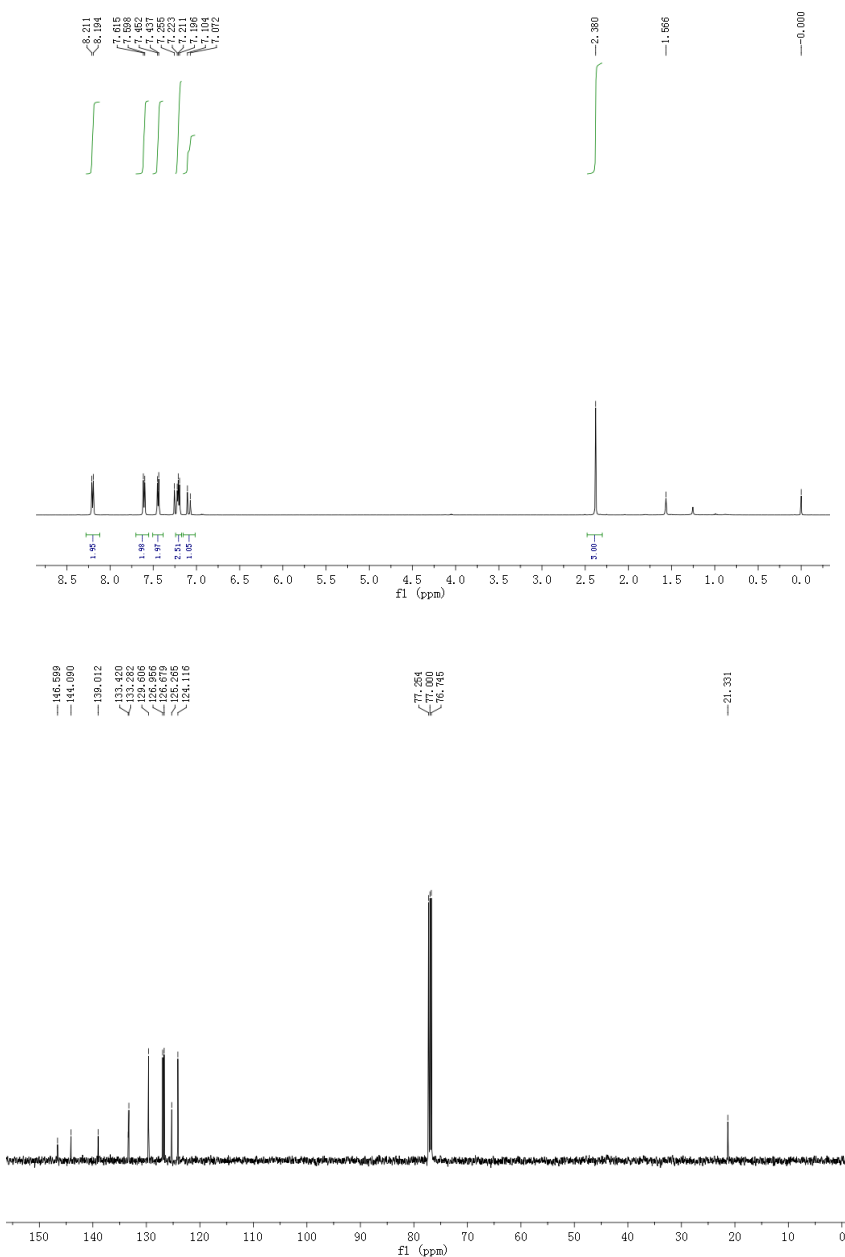

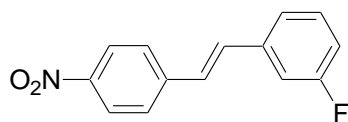

Compound **4p** [10]: a yellow solid;  $^1\text{H}$  NMR (300 MHz,  $\text{CDCl}_3$ )  $\delta$  7.02 (t,  $J = 8.0$  Hz, 1H), 7.13 (d,  $J = 16.0$  Hz, 1H), 7.22 (d,  $J = 16.0$  Hz, 1H), 7.31–7.38 (m, 3H), 7.63 (d,  $J = 8.5$  Hz, 2H), 8.22 (d,  $J = 8.5$  Hz, 2H);  $^{13}\text{C}$  NMR (125 MHz,  $\text{CDCl}_3$ )  $\delta$  113.2 (d,  $J_{\text{C-F}} = 21.9$  Hz), 115.6 (d,  $J_{\text{C-F}} = 21.3$  Hz), 123.0, 124.1, 127.0, 127.6, 130.4 (d,  $J_{\text{C-F}} = 8.3$  Hz), 131.9, 138.5 (d,  $J_{\text{C-F}} = 7.5$  Hz), 143.3, 147.0, 163.2 (d,  $J_{\text{C-F}} = 244.6$  Hz).

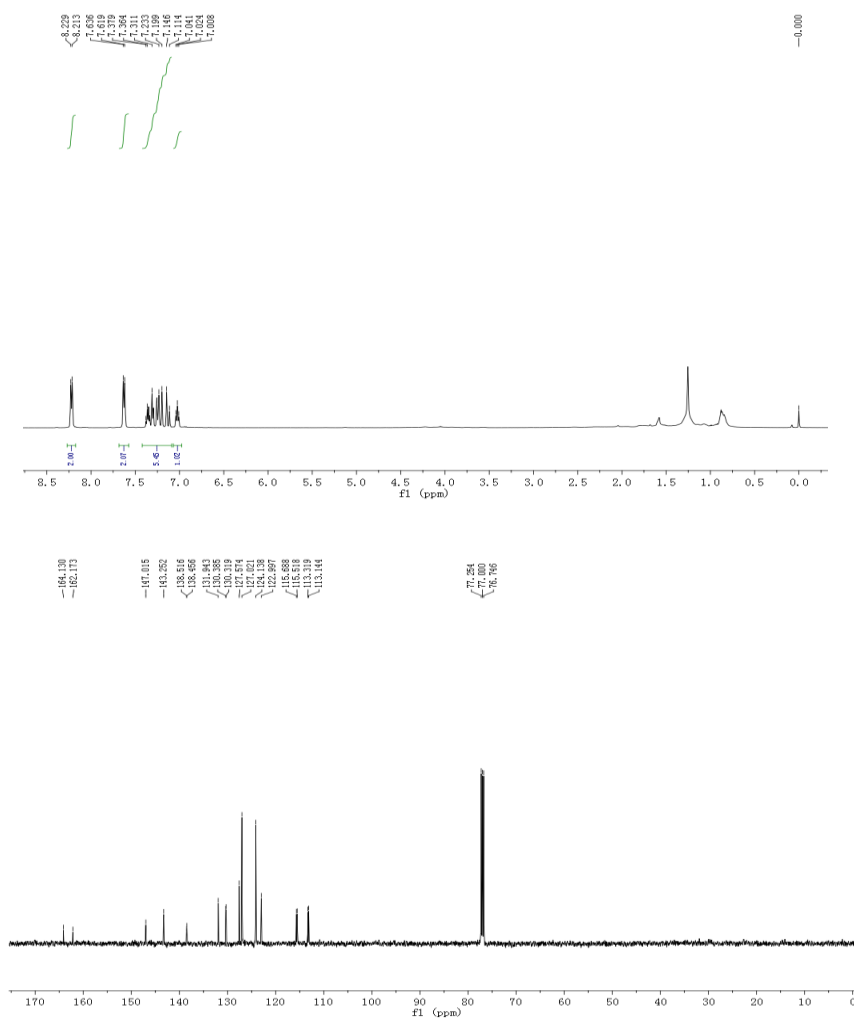

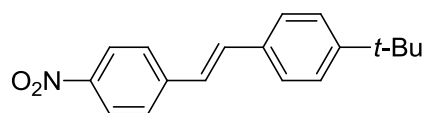

Compound **4q** [11]: a yellow solid;  $^1\text{H}$  NMR (300 MHz,  $\text{CDCl}_3$ )  $\delta$  1.34 (s, 9H), 7.10 (d,  $J = 16.0$  Hz, 1H), 7.25 (d,  $J = 16.0$  Hz, 1H), 7.42 (d,  $J = 8.0$  Hz, 2H), 7.49 (d,  $J = 8.0$  Hz, 2H), 7.61 (d,  $J = 8.0$  Hz, 2H), 8.20 (d,  $J = 8.0$  Hz, 2H);  $^{13}\text{C}$  NMR (125 MHz,  $\text{CDCl}_3$ )  $\delta$  31.2, 34.8, 124.1, 125.5, 125.8, 126.7, 126.8, 133.2, 133.4, 144.1, 146.6, 152.2.

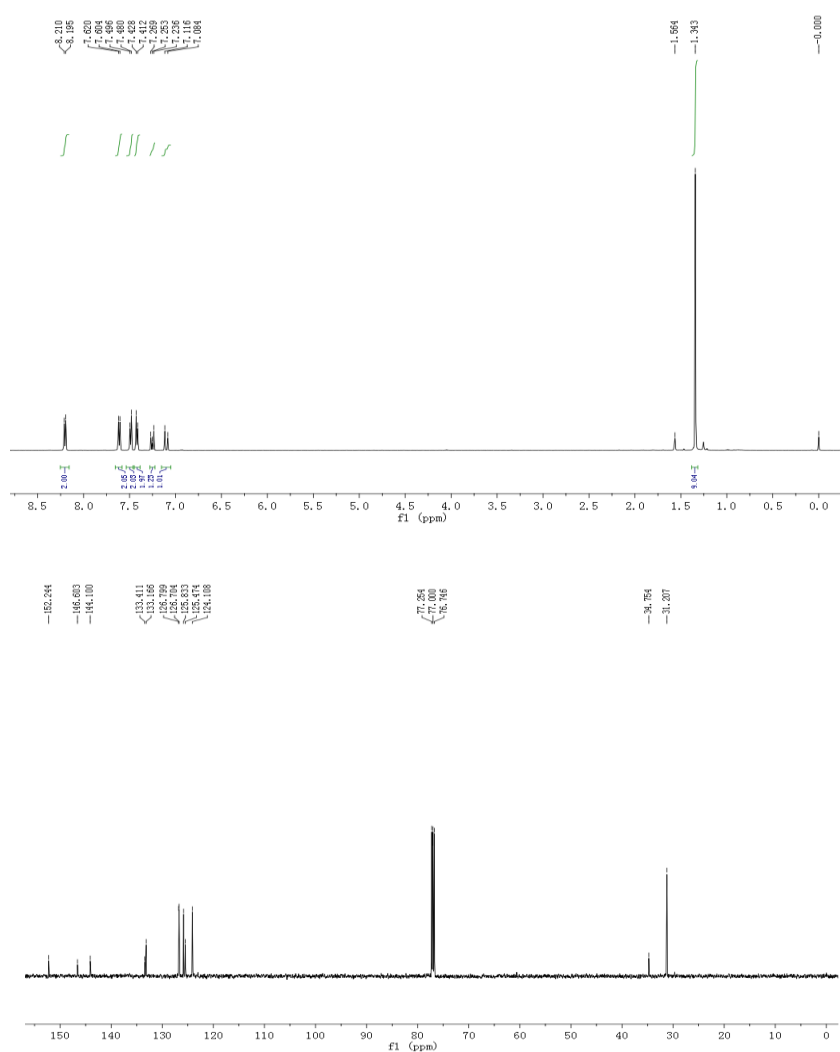

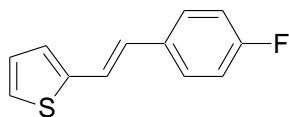

Compound **4r** [12]: a yellow solid;  $^1\text{H}$  NMR (300 MHz,  $\text{CDCl}_3$ )  $\delta$  6.88 (d,  $J = 16.2$  Hz, 1H), 6.98–7.11 (m, 5H), 7.18 (dd,  $J = 4.2, 5.1$  Hz, 1H), 7.38–7.45 (m, 2H).  $^{13}\text{C}$  NMR (125 MHz,  $\text{CDCl}_3$ )  $\delta$  115.6 (d,  $J_{\text{C-F}} = 21.6$  Hz), 124.3, 126.1, 127.1, 127.6, 127.8 (d,  $J_{\text{C-F}} = 8.0$  Hz), 133.1, 142.7, 162.3 (d,  $J_{\text{C-F}} = 245.9$  Hz).

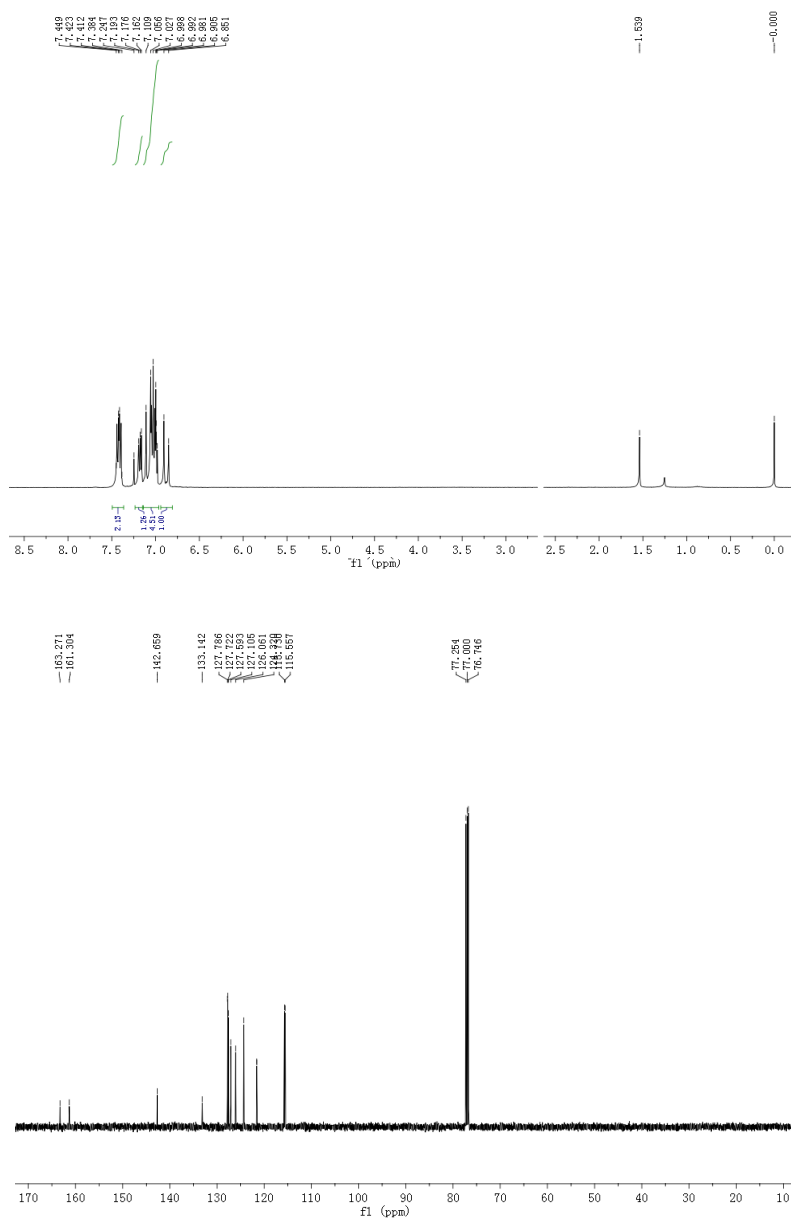

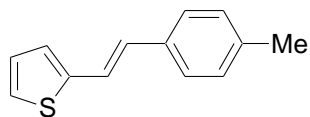

Compound **4s** [12]: a yellow solid; <sup>1</sup>H NMR (500 MHz, CDCl<sub>3</sub>) δ 2.35 (s, 3H), 6.90 (d, *J* = 16.0 Hz, 1H), 6.99 (t, *J* = 3.5 Hz, 1H), 7.04 (d, *J* = 3.5 Hz, 1H), 7.14–7.24 (m, 4H), 7.36–7.49 (d, *J* = 8.0 Hz, 2H); <sup>13</sup>C NMR (125 MHz, CDCl<sub>3</sub>) δ 21.2, 120.8, 124.0, 125.7, 126.2, 127.5, 128.3, 129.4, 134.2, 137.5, 143.1.

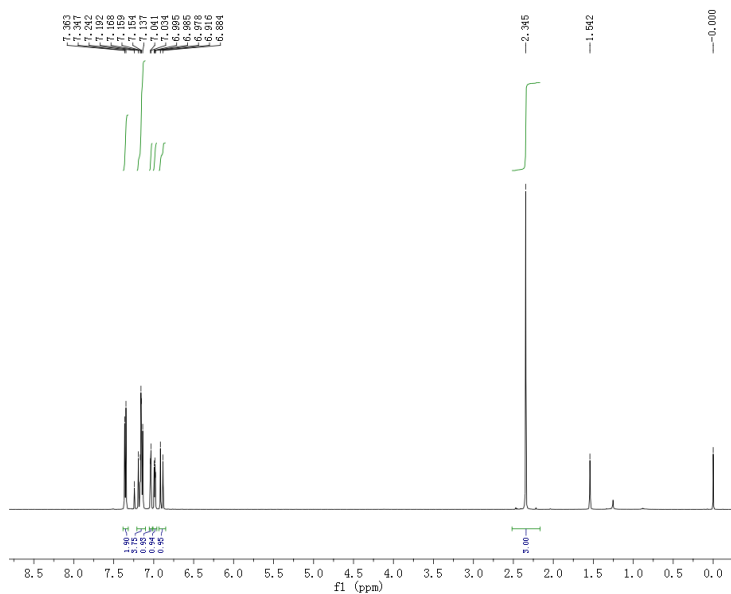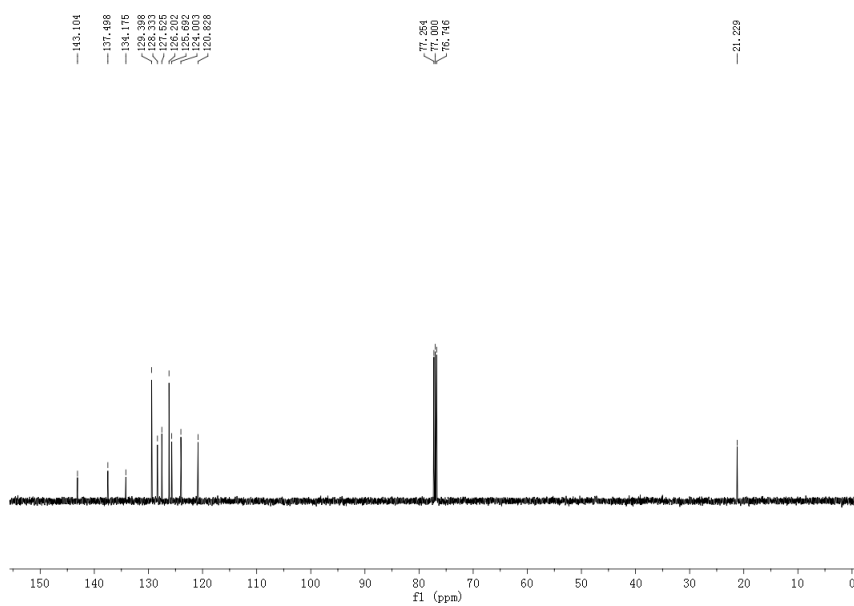

## References

1. Xu, H.-J.; Zhao, Y.-Q.; Zhou, X.-F. *J. Org. Chem.* **2011**, *76*, 8036-8041.
2. Leng, Y.-T.; Yang, F.; Wei, K.; Wu, Y.-J. *Tetrahedron* **2010**, *66*, 1244-1248.
3. Inomata, S.; Hiroki, H.; Terashima, T.; Ogata, K.; Fukuzawa, S.-i. *Tetrahedron* **2011**, *67*, 7263-7267.
4. Wang, W.; Yang, Q.; Zhou, R.; Fu, H.-Y.; Li, R.-X.; Li, X.-J. *J. Organomet. Chem.* **2012**, *697*, 1-5.
5. Blakemore, J. D.; Chalkley, M. J.; Farnaby, J. H.; Guard, L. M.; Hazari, N.; Incarvito, C. D.; Luzik, E. D., Jr.; Suh, H. W. *Organometallics* **2011**, *30*, 1818-1829.
6. Mochida, S.; Hirano, K.; Satoh, T.; Miura, M. *J. Org. Chem.* **2011**, *76*, 3024-3033.
7. Wu, K.-M.; Huang, C.-A.; Peng, K.-F.; Chen, C.-T. *Tetrahedron* **2005**, *61*, 9679-9687.
8. Kabalka, G. W.; Al-Masum, M.; Mereddy, A. R.; Dadush, E. *Tetrahedron Lett.* **2006**, *47*, 1133-1136.
9. Wu, S.; Ma, H.-C.; Jia, X.-J.; Zhong, Y.-M.; Lei, Z.-Q. *Tetrahedron* **2011**, *67*, 250-256.
10. Simons, L. J.; Caprathe, B. W.; Callahan, M.; Graham, J. M.; Kimura, T.; Lai, Y.-J.; LeVine, H., III; Lipinski, W.; Sakkab, A.; Tasaki, Y.; Walker, L. C.; Yasunaga, T.; Ye, Y.-Y.; Zhuang, N.; Augelli-Szafran, C. E. *Bioorg. Med. Chem. Lett.* **2009**, *19*, 654-657.
11. Sawoo, S.; Srimani, D.; Dutta, P.; Lahiri, R.; Sarkar, A. *Tetrahedron* **2009**, *65*, 4367-4374.
12. Ho, J.-H.; Ho, T.-I. *J. Chin. Chem. Soc.* **2003**, *50*, 109-114.
